# Supplementary material for: Synthesis of a Ni2P/Ni12P5 bi-phase nanocomposite for the efficient catalytic reduction of 4-nitrophenol based on the unique n–n heterojunction effects
Source: Royal Society of Chemistry journal article supplement (doi:10.1039/c7dt02375h), 2017-01-01
Supplement: c7dt02375h1.pdf [file c7dt02375h1.pdf]

## *Supplementary Information*

### **Synthesis of $\text{Ni}_2\text{P}/\text{Ni}_{12}\text{P}_5$ bi-phase nanocomposite for efficient catalytic reduction of 4-nitrophenol based on the unique n-n heterojunction effects**

Feng-Yu Tian, Dongfang Hou\*, Wei-Ming Zhang, Xiu-Qing Qiao and Dong-Sheng Li\*

*College of Materials and Chemical Engineering, Hubei Provincial Collaborative Innovation*

*Center for New Energy Microgrid, Key laboratory of inorganic nonmetallic crystalline and energy conversion materials, China*

*Three Gorges University, Yichang 443002, P. R. China*

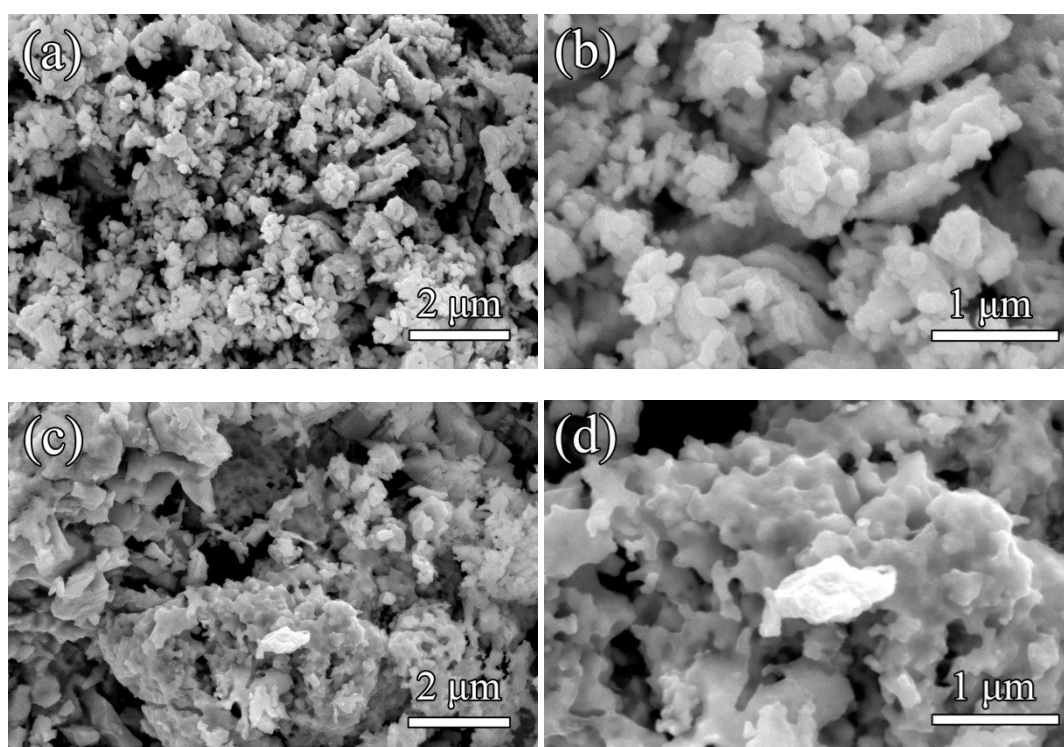

**Fig. S1** (a, b) FE-SEM images of  $\text{Ni}_{12}\text{P}_5$ , (c, d) FE-SEM images of  $\text{Ni}_2\text{P}$ .

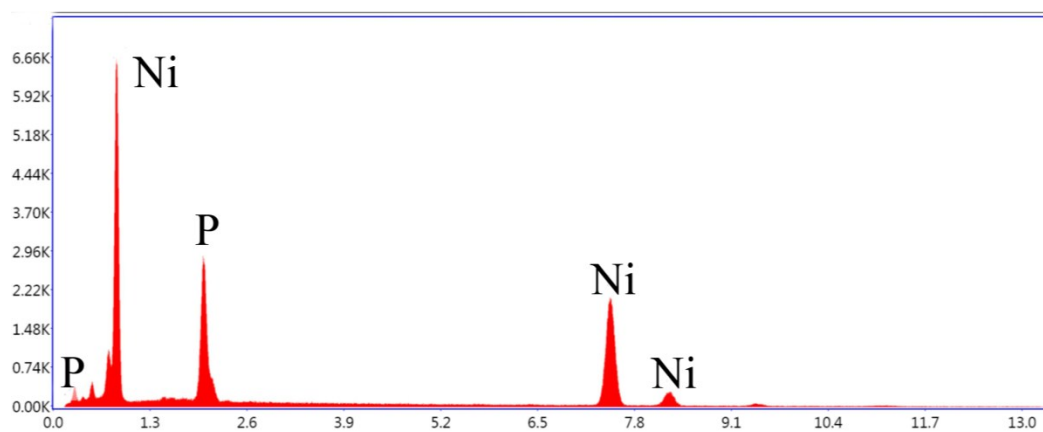

**Fig. S2** EDX result of  $\text{Ni}_2\text{P}/\text{Ni}_{12}\text{P}_5$  sample.

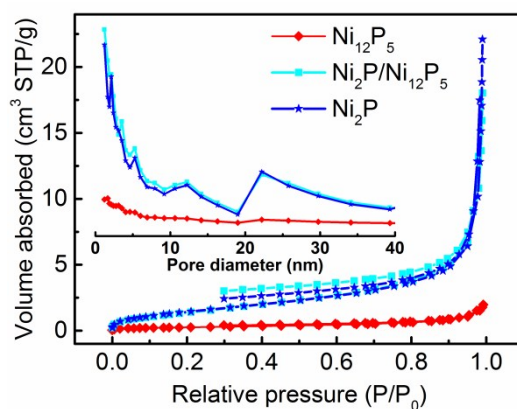

**Fig. S3**  $\text{N}_2$  adsorption-desorption isotherms and the corresponding pore size distribution (inset) of the three samples.

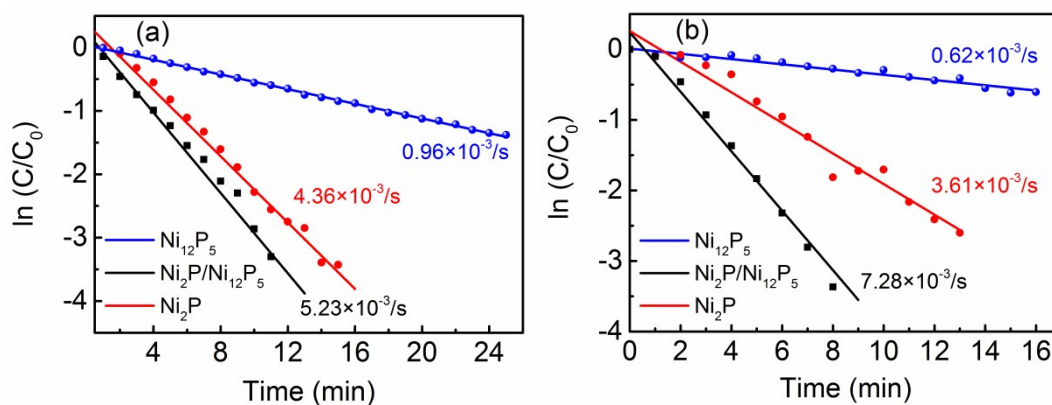

**Fig. S4**  $\ln(C/C_0)$  versus time during the course of reduction of (a) o-NP and (b) 3-NP with different catalysts.
